# Supplementary material for: XCO 2 in an emission hot-spot region: the COCCON Paris campaign 2015
Source: Copernicus journal article supplement (doi:10.5194/acp-19-3271-2019), 2019-03-13
Supplement: Supplementary file 1 [file acp-19-3271-2019-supplement.pdf]

Supplement of Atmos. Chem. Phys., 19, 3271–3285, 2019  
<https://doi.org/10.5194/acp-19-3271-2019-supplement>  
© Author(s) 2019. This work is distributed under  
the Creative Commons Attribution 4.0 License.

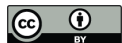

*Supplement of*

## **XCO<sub>2</sub> in an emission hot-spot region: the COCCON Paris campaign 2015**

**Felix R. Vogel et al.**

*Correspondence to:* Felix R. Vogel ([felix.vogel@canada.ca](mailto:felix.vogel@canada.ca))

The copyright of individual parts of the supplement might differ from the CC BY 4.0 License.

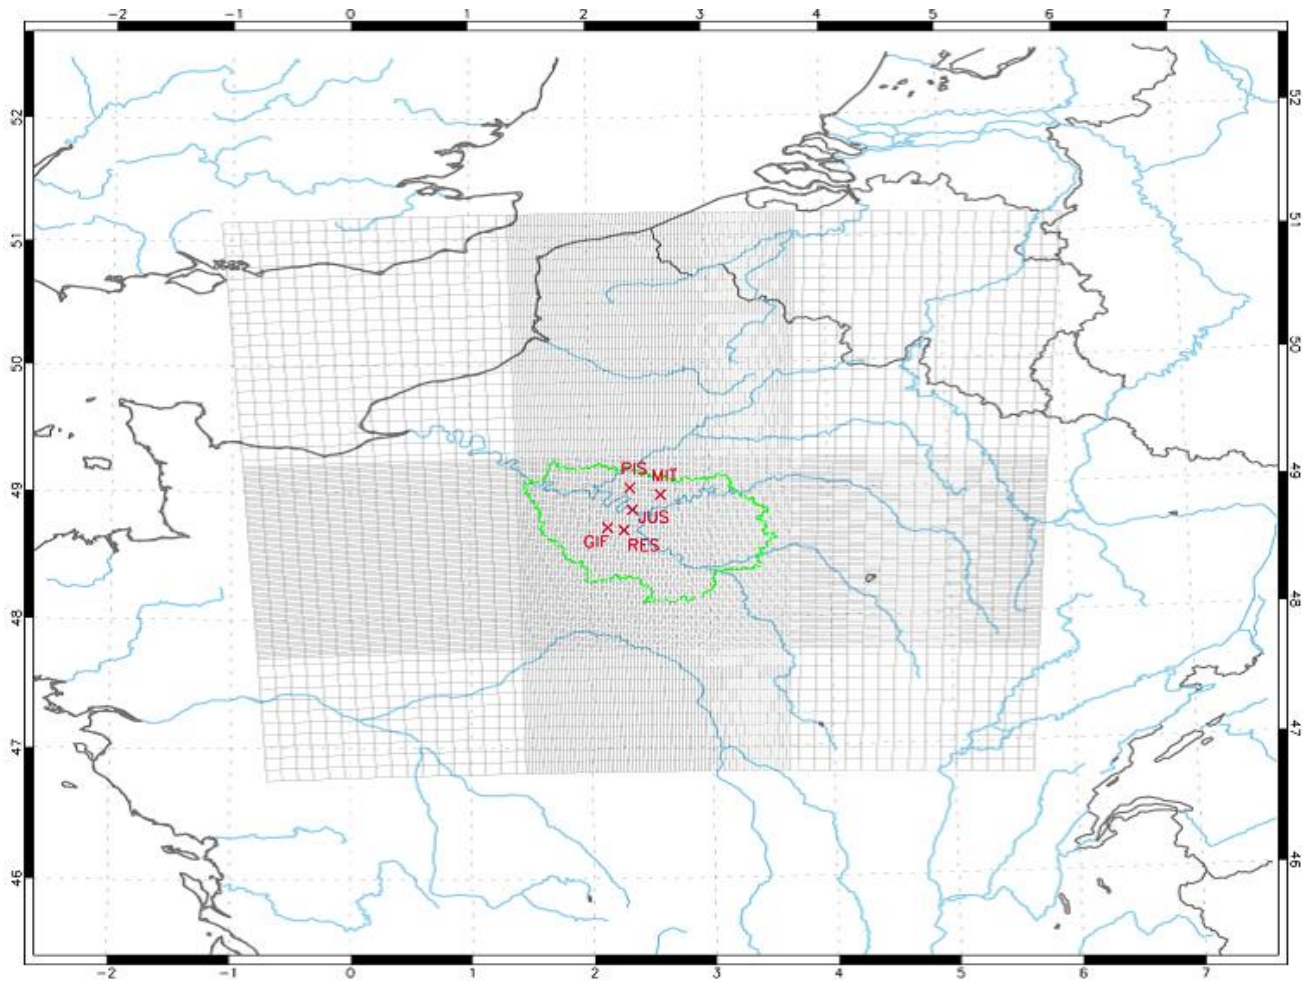

Figure S1. Modelling domain and numerical grid configuration of CHIMERE with a zoom on the Île-de-France region at 2 x 2 km<sup>2</sup>.

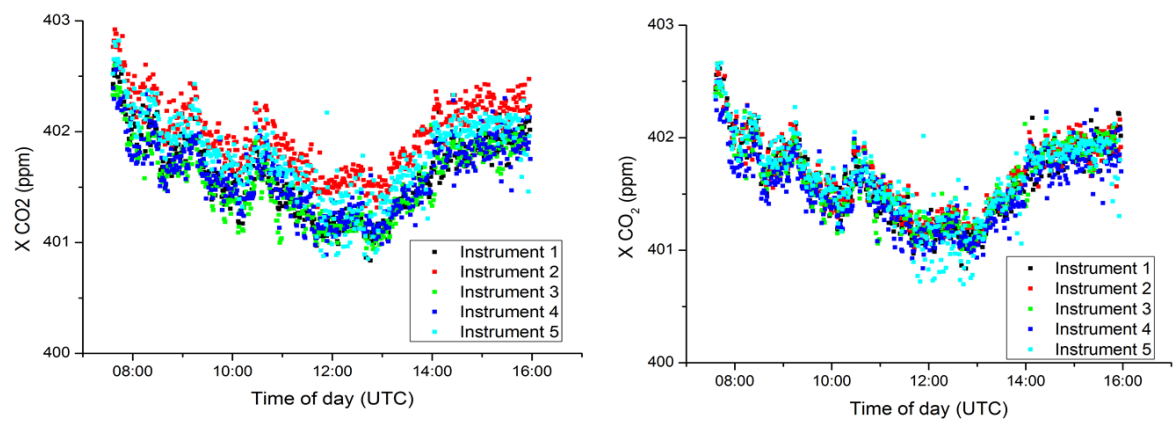

**Figure S2. Sample parallel measurements of the five EM27/SUN instruments in Karlsruhe for raw data (left panel) and the data with the applied correction (right panel) taken on April 15<sup>th</sup>, 2015.**

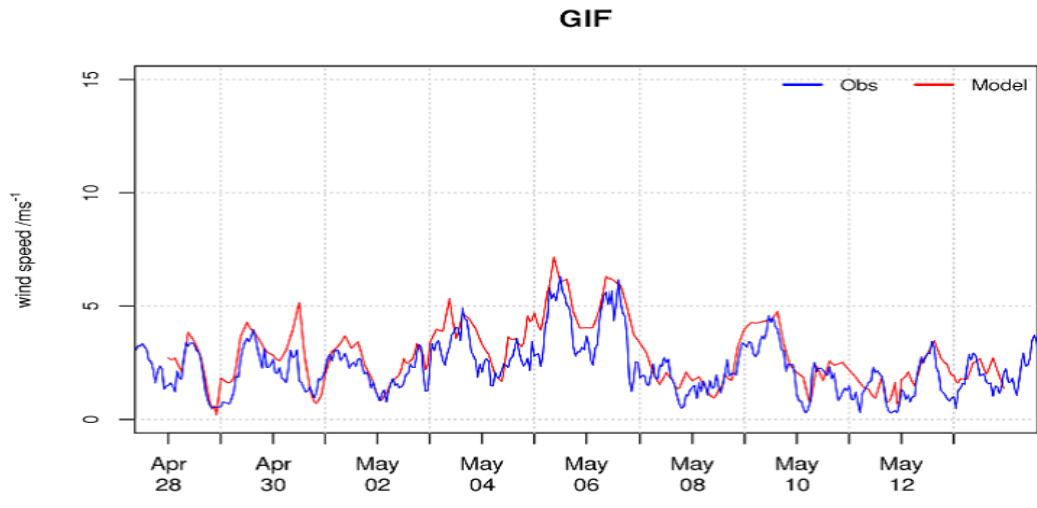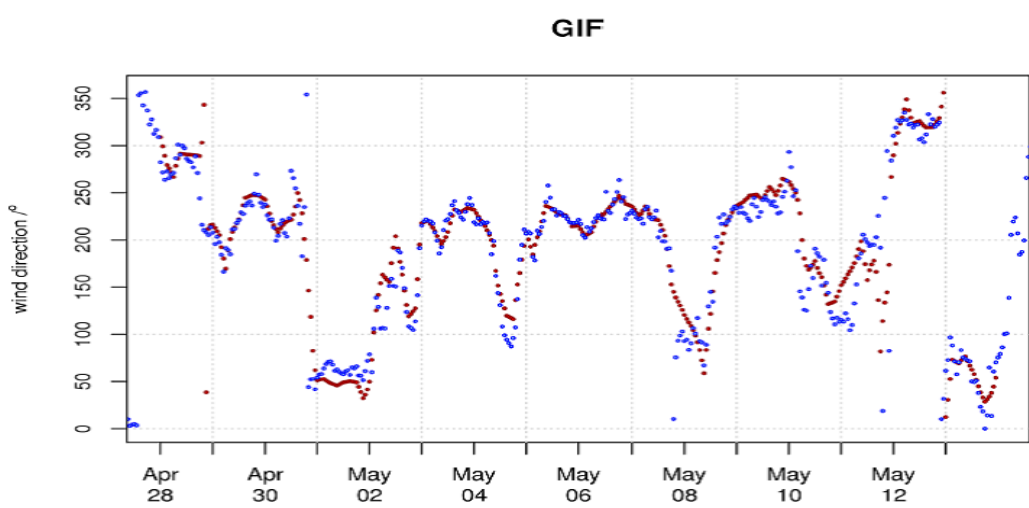

**Figure S3. Comparison of modelled and observed wind speeds and directions at the Gif-Sur-Yvette measurement site**

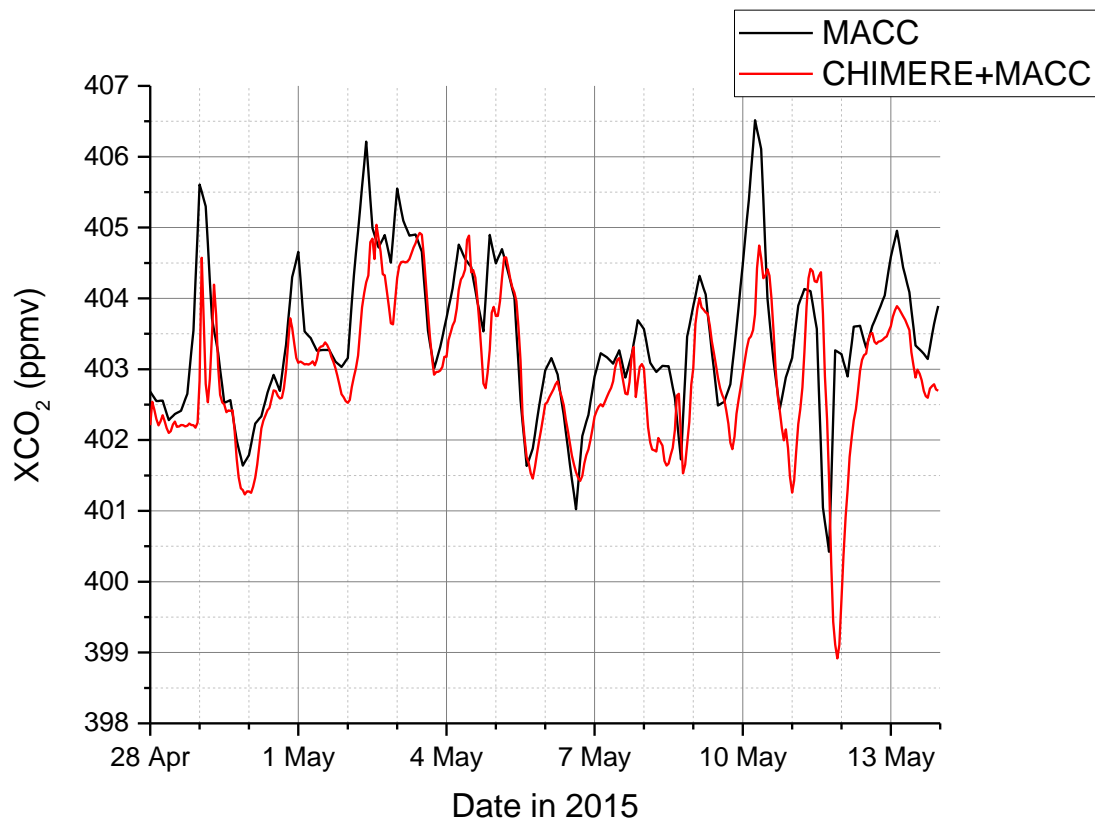

**Figure S4. Comparison of modelled XCO<sub>2</sub> from ECWMF-CAMS (15 x 15 km<sup>2</sup>), here MACC (Monitoring Atmospheric Composition and Chemistry), with CHIMERE simulation (inner domain, 2 x 2 km<sup>2</sup>) for JUS.**

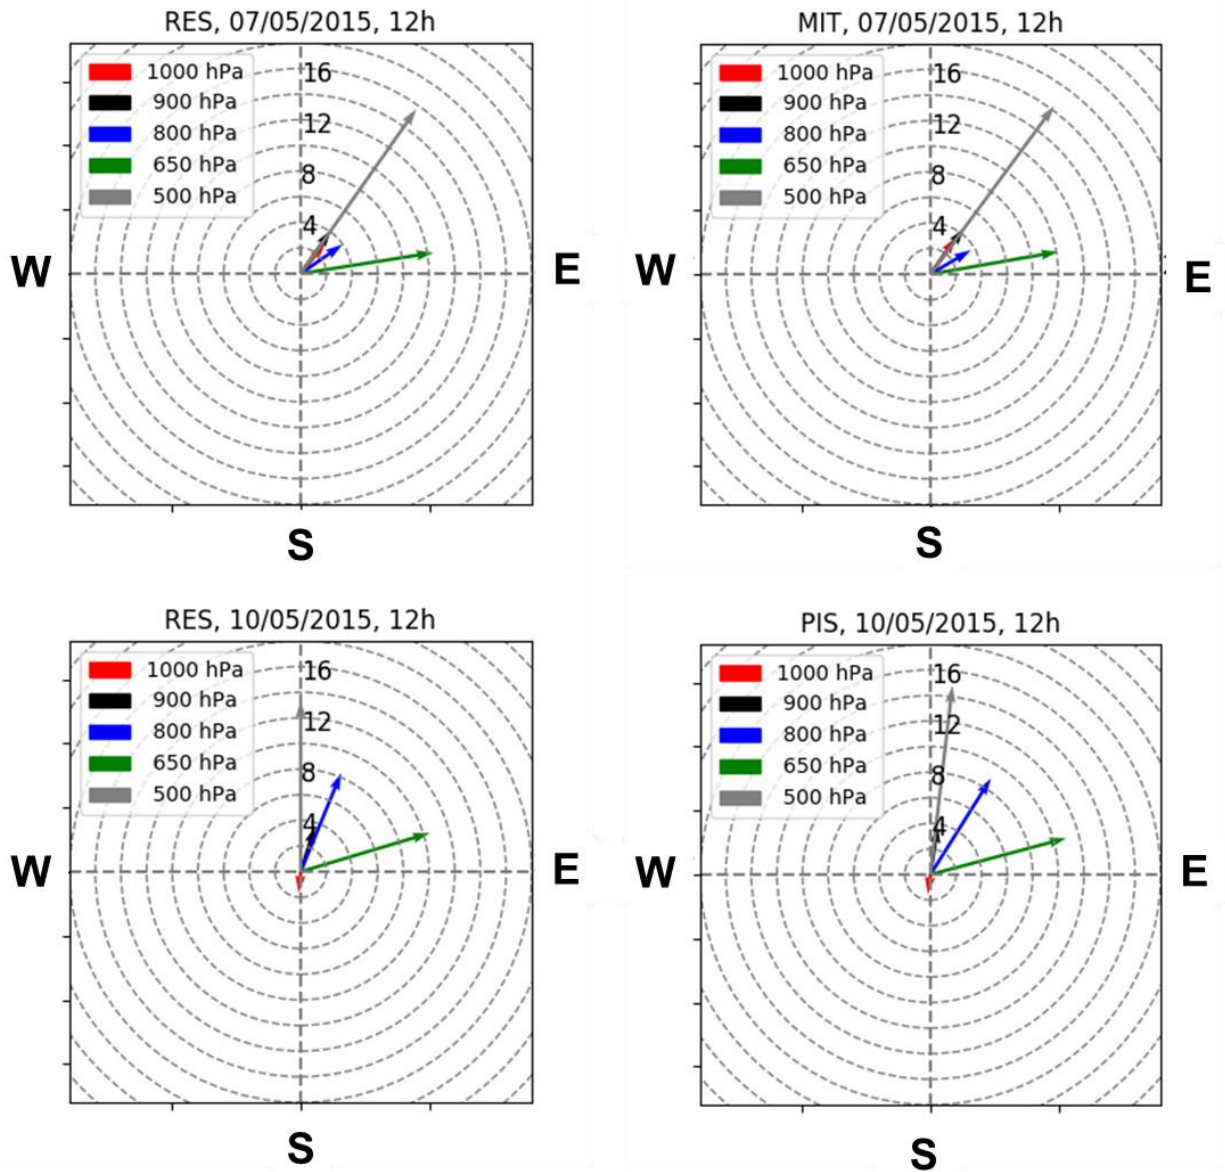

**Figure S5. Hodograph for selected sites and days (aligned with Figure 4). Averaged wind speed direction in different heights based on ECMWF ERA-interim winds interpolated by CHIMERE.**

| Location            | ID  | Lat (deg) | Lon (deg) | Position          | Distance and bearing to site from Saulx-Les-Chartreux (RES) |
|---------------------|-----|-----------|-----------|-------------------|-------------------------------------------------------------|
| Piscop              | PIS | 49.019    | 2.347     | 20 km NNW of JUS  | 37km at 7°                                                  |
| Mitry-Mory          | MIT | 48.984    | 2.626     | 25 km NW of JUS   | 41km at 37°                                                 |
| Jussieu             | JUS | 48.846    | 2.356     | Paris city centre | 18km at 17°                                                 |
| Saulx-les-Chartreux | RES | 48.688    | 2.284     | 20 km SSW of JUS  | ---                                                         |
| Gif-Sur-Yvette      | GIF | 48.708    | 2.148     | 20 km SW of JUS   | 10km at 282°                                                |

Table S1. Location of FTIR measurement instruments during the field campaign

|     | Total obs | Mean (ppm) | STD (ppm) | Quartile1 (ppm) | Median (ppm) | Quartile3 (ppm) |
|-----|-----------|------------|-----------|-----------------|--------------|-----------------|
| RES | 2616      | 401.11     | 0.93      | 400.44          | 400.88       | 401.96          |
| GIF | 1888      | 401.05     | 0.92      | 400.94          | 400.94       | 401.58          |
| JUS | 1803      | 401.33     | 1.17      | 401.31          | 401.31       | 402.04          |
| PIS | 1904      | 401.62     | 0.95      | 401.03          | 401.59       | 402.44          |
| MIT | 2207      | 401.26     | 1.15      | 401.11          | 401.11       | 401.95          |

Table S2. Statistics of observed XCO<sub>2</sub> 1-minute averages for all sites
